# Supplementary material for: Spermatogenesis is normal in Tex33 knockout mice
Source: PeerJ journal article supplement (doi:10.7717/peerj.9629), 2020-07-29

# Supplementary Figure 1

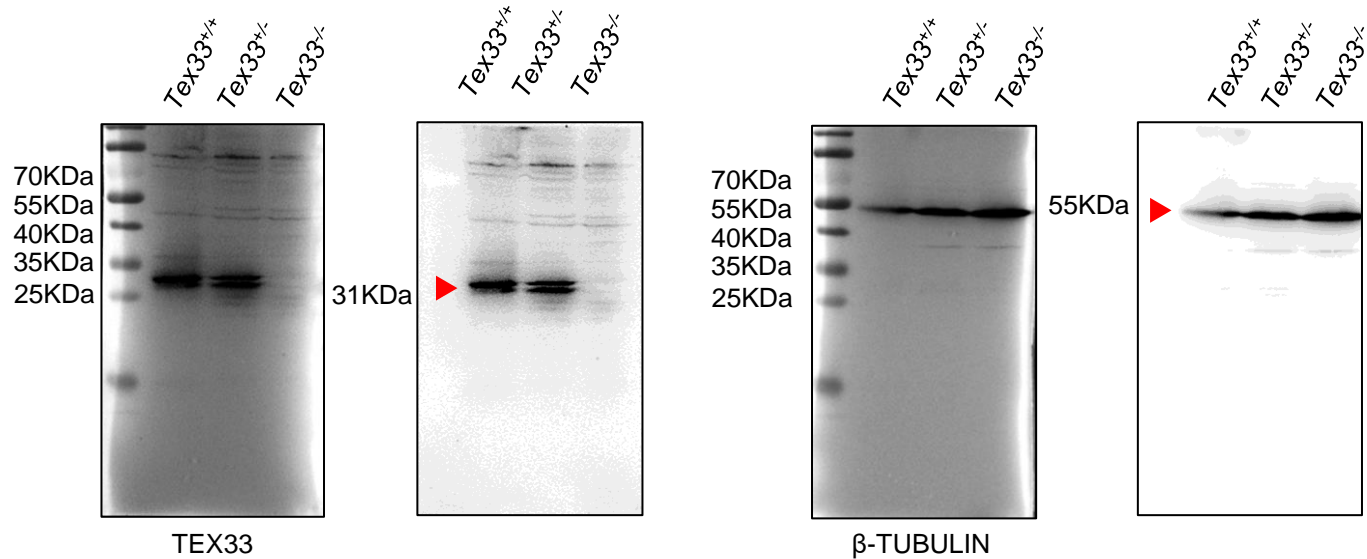

Supplement: FigureS1.pdf [file FigureS1.pdf]
