# Supplementary material for: Spermatogenesis is normal in Tex33 knockout mice
Source: PeerJ journal article supplement (doi:10.7717/peerj.9629), 2020-07-29

# Supplementary Figure 2

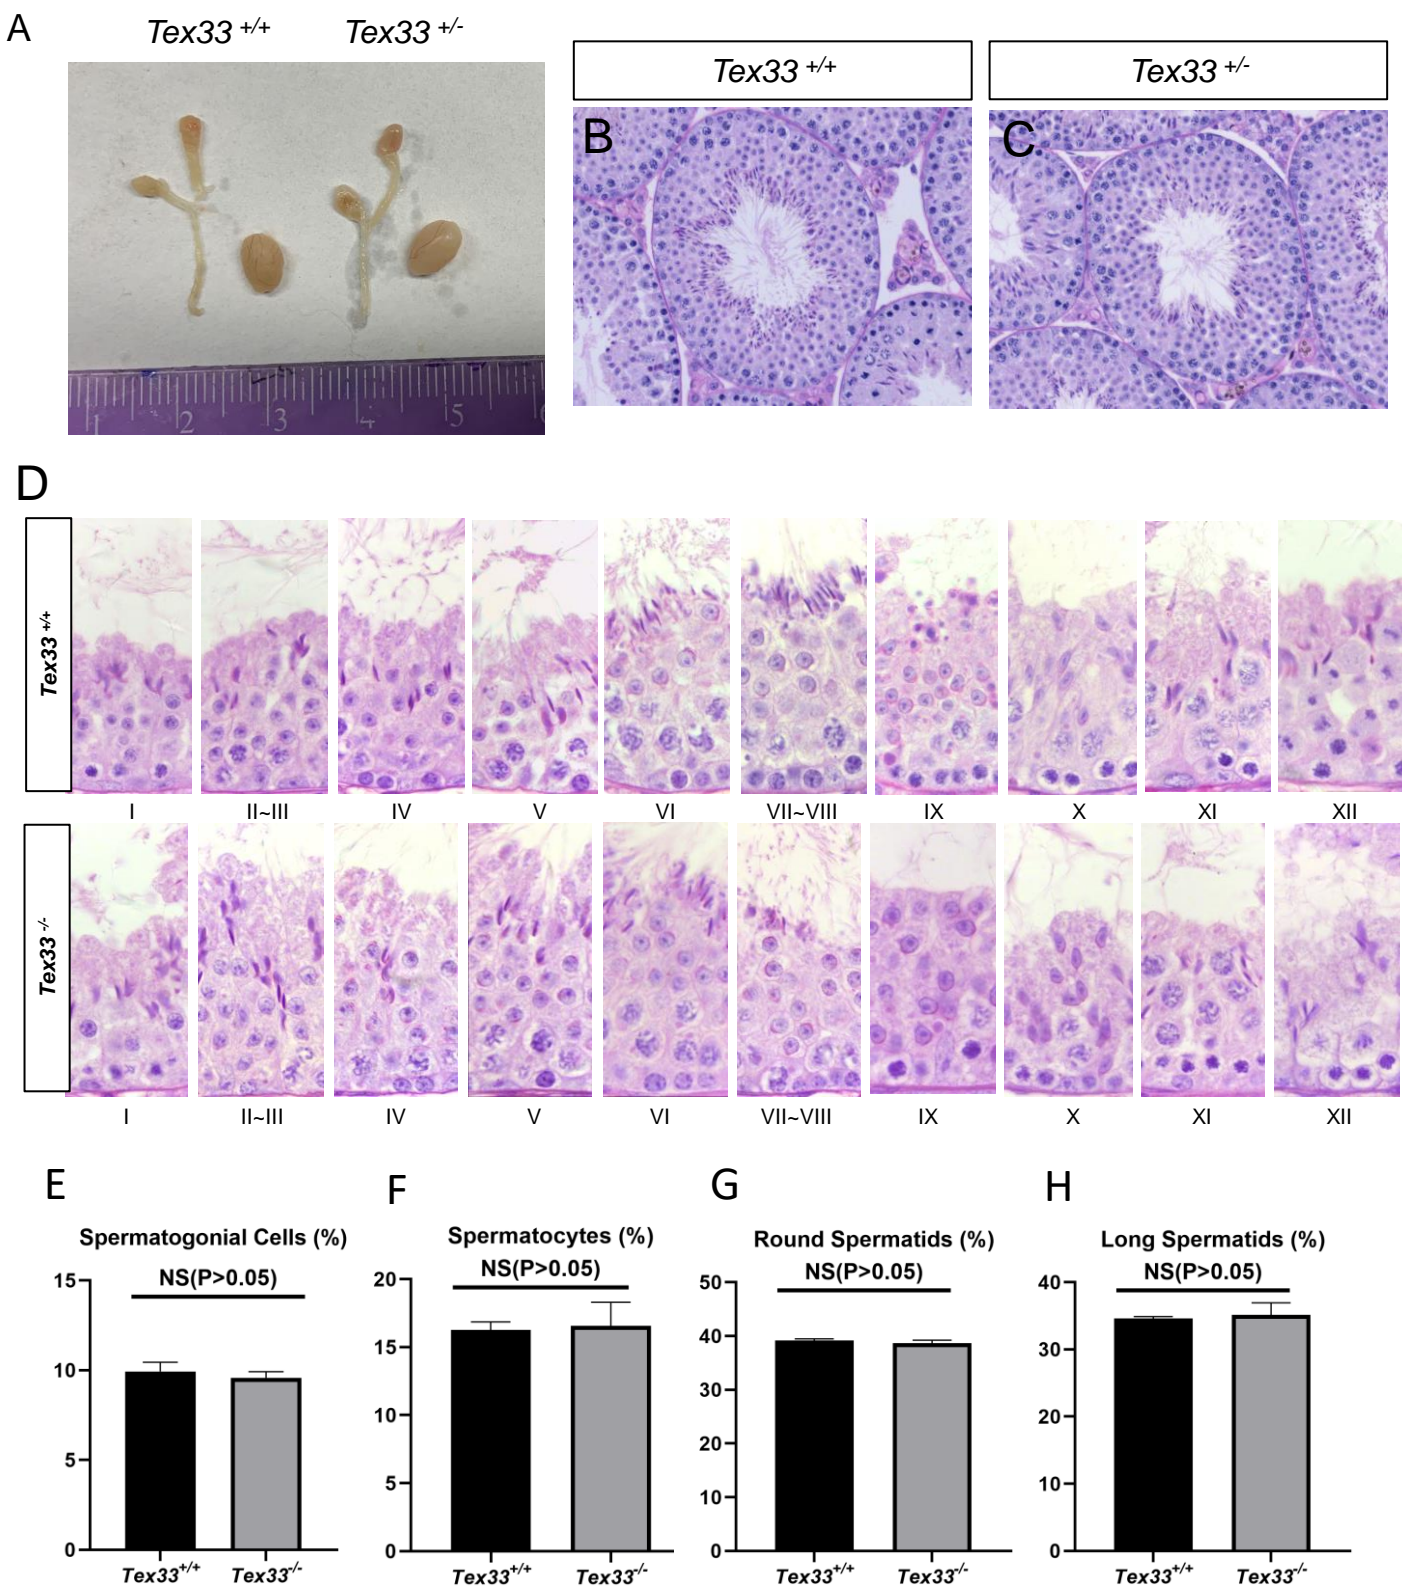

Supplement: FigureS2.pdf [file FigureS2.pdf]
