# Supplementary material for: Spermatogenesis is normal in Tex33 knockout mice
Source: PeerJ journal article supplement (doi:10.7717/peerj.9629), 2020-07-29

# Supplementary Figure 3

## A

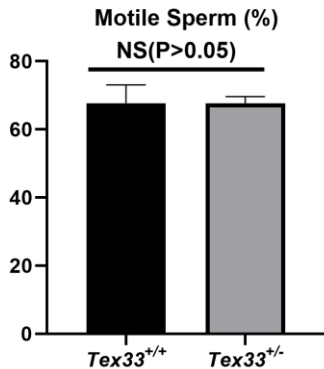

## B

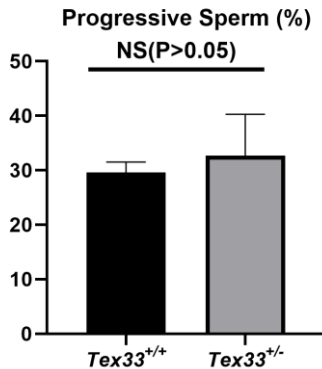

## C

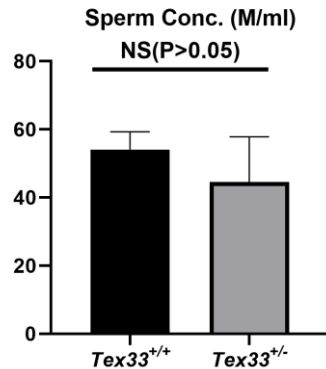

Supplement: FigureS3.pdf [file FigureS3.pdf]
