# Supplementary material for: Spermatogenesis is normal in Tex33 knockout mice
Source: PeerJ. 2020 Jul 29;8:e9629. doi: 10.7717/peerj.9629 (PMC7395601; doi:10.7717/peerj.9629)
Supplement: Supplemental Information 4 [file peerj-08-9629-s004.xlsx]

## Sheet: Sheet1
	Apoptotic Cells/Whole Tubule
	WT	Hom
1	0.4716	0.4423
2	0.3153	0.3899
3	0.5214	0.3302
