# Supplementary material for: Spermatogenesis is normal in Tex33 knockout mice
Source: PeerJ. 2020 Jul 29;8:e9629. doi: 10.7717/peerj.9629 (PMC7395601; doi:10.7717/peerj.9629)
Supplement: Table S1 [file peerj-08-9629-s001.xlsx]

## Sheet: Sheet1
	WT1	Hom1	WT2	Hom2	WT3	Hom3
Body Weight(g)	32.45	26.2	25.56	26.23	29.62	30.65
Left Testis Weight(mg)	99.41	102.83	88.12	87.34	90.24	86.06
Right Testis Weight(mg)	99.28	103.01	87.94	87.15	90.16	86.3
Whole Testis Weight(mg)	198.69	205.84	176.06	174.49	180.4	172.36
Testis/Body Weight	0.00612296	0.00785649	0.00688811	0.00665231	0.00609048	0.00562349
