# Supplementary material for: Spermatogenesis is normal in Tex33 knockout mice
Source: PeerJ. 2020 Jul 29;8:e9629. doi: 10.7717/peerj.9629 (PMC7395601; doi:10.7717/peerj.9629)
Supplement: Table S2 [file peerj-08-9629-s002.xlsx]

## Sheet: Sheet1
Pups/Litter	WT1	Hom1	WT2	Hom2	WT3	Hom3
	4	4	2	7	3	4
	3	6	4	7	8	6
	8	4	8	6	12	5
	8	8	6	10	9	3
Average Pups/Litter	5.75	5.5	5	7.5	8	4.5
