# Supplementary material for: Spermatogenesis is normal in Tex33 knockout mice
Source: PeerJ. 2020 Jul 29;8:e9629. doi: 10.7717/peerj.9629 (PMC7395601; doi:10.7717/peerj.9629)
Supplement: Table S3 [file peerj-08-9629-s003.xlsx]

## Sheet: Sheet1
	Apoptotic Tubule/Whole Tubule
	WT	Hom
1	0.2523	0.2201
2	0.1261	0.1743
3	0.2428	0.1132
