# Supplementary material for: Spermatogenesis is normal in Tex33 knockout mice
Source: PeerJ. 2020 Jul 29;8:e9629. doi: 10.7717/peerj.9629 (PMC7395601; doi:10.7717/peerj.9629)
Supplement: Table S5 [file peerj-08-9629-s005.xlsx]

## Sheet: Sheet1
	Tex33+/+ Tubule Diameter (μm)			Tex33-/-Tubule Diameter (μm)
N	WT1	WT2	WT3	Hom1	Hom2	Hom3
1	228.35	231.68	285.81	214.9	222.48	224.58
2	213.39	195.72	241.06	261.51	220.56	266.09
3	204.43	216.63	258.99	283.07	212.88	230.1
4	290.64	229.43	260	256.65	255.99	209.34
5	211.39	227.05	267.79	244.42	255.77	202.23
6	224.77	223.36	241.59	238.72	215.32	199.33
7	223.5	246.83	292.62	185.61	213.92	232.46
8	229.86	227.56	303.66	222.78	201.11	226.15
9	198.38	221.31	283.3	269.27	175.06	212.3
10	226.63	208.28	214.1	213.46	245.05	275.88
11	217.67	201.66	204.32	243.15	233.99	215.96
12	232.08	206.44	234.09	212.24	207.46	266.82
13	203.58	227.35	233.44	287.76	179.66	204.97
14	217.87	211.4	270.12	251.57	270.55	204.39
15	228.85	192.2	254.48	327.67	197.06	191.26
16	227.34	189.85	289.77	230.74	195.78	196.85
17	216.73	200.66	203.6	196.47	206.61	235.03
18	215.52	198.77	276.75	307.86	208.34	178.04
19	210.29	212.42	232.06	302.58	220.85	209.57
20	219.59	189.8	271.36	278.43	211.11	387.46
Average	222.043	212.92	255.946	251.443	217.478	228.44
