# Supplementary material for: Spermatogenesis is normal in Tex33 knockout mice
Source: PeerJ. 2020 Jul 29;8:e9629. doi: 10.7717/peerj.9629 (PMC7395601; doi:10.7717/peerj.9629)
Supplement: Table S6 [file peerj-08-9629-s006.xlsx]

## Sheet: Sheet1
	Tex33+/+ Epithelium Height (μm)			Tex33-/- Epithelium Height (μm)
N	WT1	WT2	WT3	Hom1	Hom2	Hom3
1	53.72	49.89	61.63	68.88	74.7	64.84
2	53.88	54.68	70.32	62.84	68.54	53.35
3	66.95	55.12	53.52	62.2	71.54	70.74
4	55.49	69.72	63.14	57.72	54.57	56.87
5	54.41	63.41	67.7	78.29	55.66	57.28
6	56.2	62.77	64	60.18	45.63	60.34
7	63.17	63.21	58.94	60.13	55.45	50.9
8	58.45	69.31	68.04	53.23	54.03	58.19
9	57.01	60.52	75.9	59.47	60.31	72.51
10	55.51	65.16	57.39	71.95	62.84	67.86
11	58.04	52.22	69.69	61.19	51.84	61.51
12	58.01	60.55	68.21	68.9	62.87	57.72
13	67.09	52.92	72.12	70.81	49.38	53.28
14	54.03	60.52	51.19	58.32	66.95	55.45
15	46.69	61.51	65.97	73.9	40.19	62.34
16	53.65	59.14	61.04	73.85	57.3	61.28
17	56.46	64.56	53.88	52.92	60.07	62.84
18	55.07	53.47	71.77	57.36	68.69	53.4
19	63.41	61.63	56	58.94	84.08	56.05
20	52.4	63.77	59.47	64.84	67.59	78.49
Average	56.982	60.204	63.496	63.796	60.6115	60.762
