# Supplementary material for: Spermatogenesis is normal in Tex33 knockout mice
Source: PeerJ. 2020 Jul 29;8:e9629. doi: 10.7717/peerj.9629 (PMC7395601; doi:10.7717/peerj.9629)
Supplement: Table S7 [file peerj-08-9629-s007.xlsx]

## Sheet: Sheet1
	WT1	Hom1	Wt2	Hom2	WT3	Hom3
Motile Sperm Ratio	0.676	0.636	0.71	0.809	0.863	0.725
