# Supplementary material for: Spermatogenesis is normal in Tex33 knockout mice
Source: PeerJ. 2020 Jul 29;8:e9629. doi: 10.7717/peerj.9629 (PMC7395601; doi:10.7717/peerj.9629)
Supplement: Table S8 [file peerj-08-9629-s008.xlsx]

## Sheet: Sheet1
	WT1	Hom1	Wt2	Hom2	WT3	Hom3
Progressive Motile Sperm Ratio	0.169	0.364	0.261	0.217	0.325	0.135
