# Supplementary material for: Spermatogenesis is normal in Tex33 knockout mice
Source: PeerJ. 2020 Jul 29;8:e9629. doi: 10.7717/peerj.9629 (PMC7395601; doi:10.7717/peerj.9629)
Supplement: Table S10 [file peerj-08-9629-s010.xlsx]

## Sheet: Sheet1
Type	Number	Total	Abnormal Sperm	Ratio
WT	1	256	80	0.3125
	2	212	66	0.3113
	3	214	63	0.294
Hom	1	254	71	0.27952
	2	204	56	0.2745
	3	257	89	0.3463
