# Supplementary material for: Spermatogenesis is normal in Tex33 knockout mice
Source: PeerJ. 2020 Jul 29;8:e9629. doi: 10.7717/peerj.9629 (PMC7395601; doi:10.7717/peerj.9629)
Supplement: Table S12 [file peerj-08-9629-s012.xlsx]

## Sheet: Sheet1
Cell Type	Tex33+/+ Germ Cell Proportion (%)			Tex33-/- Germ Cell Proportion (%)
	WT1	WT2	WT3	Hom1	Hom2	Hom3
Average Spermatocytes	0.1694	0.1604	0.1584	0.1642	0.1837	0.1487
