# Supplementary material for: Spermatogenesis is normal in Tex33 knockout mice
Source: PeerJ. 2020 Jul 29;8:e9629. doi: 10.7717/peerj.9629 (PMC7395601; doi:10.7717/peerj.9629)
Supplement: Table S14 [file peerj-08-9629-s014.xlsx]

## Sheet: Sheet1
Cell Type	Tex33+/+ Germ Cell Proportion (%)			Tex33-/- Germ Cell Proportion (%)
	WT1	WT2	WT3	Hom1	Hom2	Hom3
Average Long Spermatids	0.3433	0.3484	0.3466	0.3433	0.3394	0.372
