# Supplementary material for: Spermatogenesis is normal in Tex33 knockout mice
Source: PeerJ. 2020 Jul 29;8:e9629. doi: 10.7717/peerj.9629 (PMC7395601; doi:10.7717/peerj.9629)
Supplement: Table S16 [file peerj-08-9629-s016.xlsx]

## Sheet: Sheet1
	WT1	Het1	WT2	Het2	WT3	Het3
Progressive Sperm Ratio	0.287	0.401	0.283	0.33	0.318	0.25
