# Supplementary material for: Spermatogenesis is normal in Tex33 knockout mice
Source: PeerJ. 2020 Jul 29;8:e9629. doi: 10.7717/peerj.9629 (PMC7395601; doi:10.7717/peerj.9629)
Supplement: Table S18 [file peerj-08-9629-s018.xlsx]

## Sheet: Sheet1
Antibodies	SOURCE	IDENTIFIER
Rabbit polyclonal anti-TEX33	Abcam, Cambridge, MA, USA	Cat#ab121241
Mouse monoclonal anti-Acetylated Tubulin	Sigma, St.Louis, MO, USA	Cat#T7451
Rabbit polyclonal anti-TNP1	Proteintech, Rosemont, IL, USA	Cat#AB5535
Rabbit polyclonal anti-gamma H2AX (phospho S139)	Abcam, Cambridge, MA, USA	Cat#ab2893
Goat polyclonal anti-PLZF	RnD Systems, Minneapolis, MN,USA	Cat#AF2944
Donkey anti-Mouse IgG, Alexa Fluor 488	Invitrogen, Carlsbad, CA, USA	Cat#A-21202
Donkey anti-Rabbit IgG, Alexa Fluor 488	Invitrogen, Carlsbad, CA, USA	Cat#A-21206
Cy3-AffiniPure Donkey Anti-Goat	Jackson, West Grove, PA,USA	Cat#705-165-147
